# Supplementary material for: Versatile methods for improving the mechanical properties of fullerene and non-fullerene bulk heterojunction layers to enable stretchable organic solar cells
Source: Royal Society of Chemistry journal article supplement (doi:10.1039/d1tc05263b), 2022-01-01
Supplement: d1tc05263b1.pdf [file d1tc05263b1.pdf]

## Supporting Information

### Versatile methods for improving the mechanical properties of bulk heterojunction layers to enable stretchable organic solar cells

*Emilie Dauzon\*, Xavier Sallenave, Cedric Plesse, Fabrice Goubard\*, Aram Amassian\*, and Thomas D. Anthopoulos\**

1,12-diazidododecane ( $C_{12}N_3$ ) was obtained by a reaction of 1,12-dibromododecane (DBDD) with sodium azide  $NaN_3$ . This synthesis (Figure 3-2) was realized by the method described by Thomas.<sup>[1]</sup>

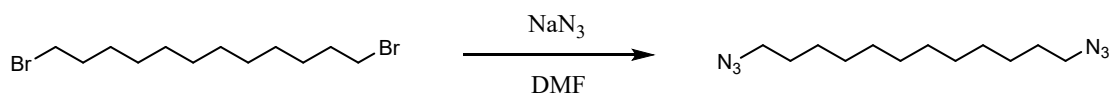

**Figure S 1: Synthesis of 1,12-diazidododecane from 1,12-dibromododecane.**

In a solution of 1,12-dibromododecane (2 g, 9 mmol) in DMF (15.0 mL) was added  $NaN_3$  (1.18 g, 27.3 mmol). The mixture was stirred for 16 h at 60°C. Then, 100 mL of water and 25 mL of diethyl ether ( $Et_2O$ ) were added. After phase separation, the aqueous solution was extracted with  $Et_2O$  (2x25 mL). The organic phase was washed with water (3x10 mL) and dried with magnesium sulfate. The solvent was evaporated, and the product was purified by column chromatography on silica (petroleum ether as eluent).  $^1H$  NMR (250 MHz,  $CDCl_3$ )  $\delta$  ppm: 3.26 (t, 4H), 1.60 (m, 4H), 1.32 (m, 16H).

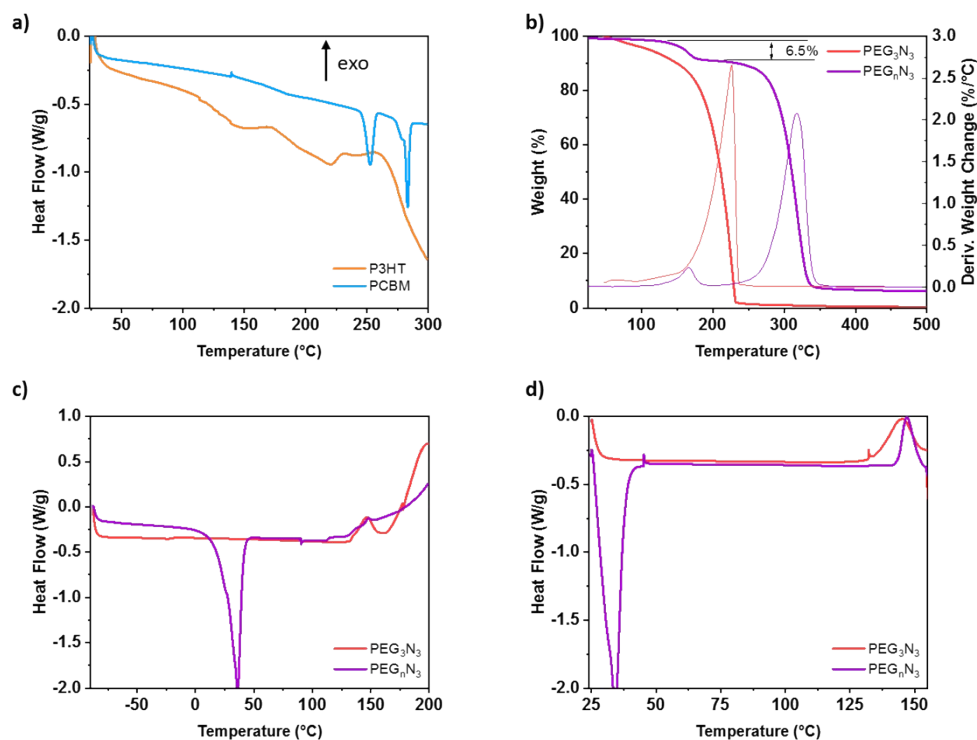

**Figure S 2: Thermal gravimetric analysis and DSC plots of a) P3HT and PC<sub>61</sub>BM, and b-d) cross-linkers PEG<sub>3</sub>N<sub>3</sub> and PEG<sub>n</sub>N<sub>3</sub> at different temperatures.**

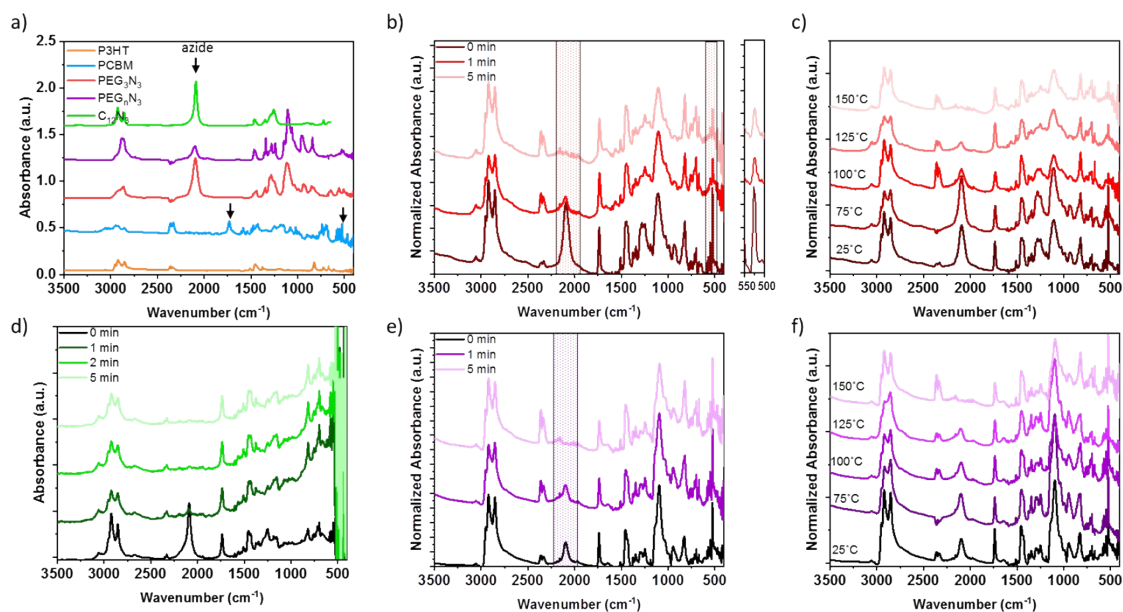

**Figure S 3: FTIR spectra of a) the precursors before cross-linking. b) Kinetic of cross-linking via monitoring P3HT:PC<sub>61</sub>BM:PEG<sub>3</sub>N<sub>3</sub> after thermal annealing at 150°C. c) Temperature effect on P3HT:PC<sub>61</sub>BM:PEG<sub>3</sub>N<sub>3</sub>, for 5 min. d) Kinetic of P3HT:PC<sub>61</sub>BM:C<sub>12</sub>N<sub>3</sub> and e) P3HT:PC<sub>61</sub>BM:PEG<sub>n</sub>N<sub>3</sub> after thermal annealing at 150°C. f) Dependence of the temperature on the cross-linking of P3HT:PC<sub>61</sub>BM:PEG<sub>n</sub>N<sub>3</sub> during 5 min of curing.**

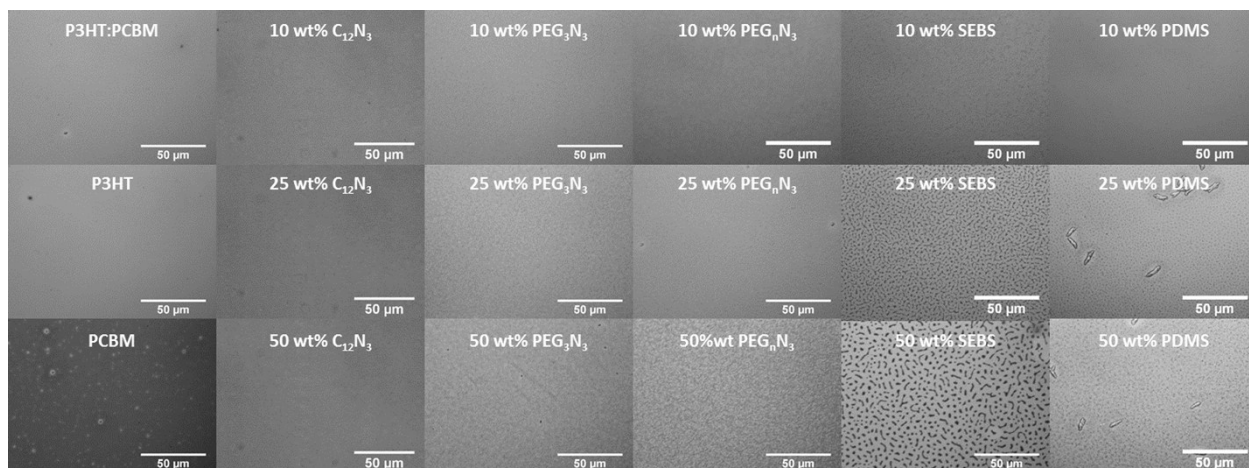

**Figure S 4: Optical micrographs of P3HT, PC<sub>61</sub>BM, and P3HT:PC<sub>61</sub>BM in the presence of additives as indicated in the picture after annealing.**

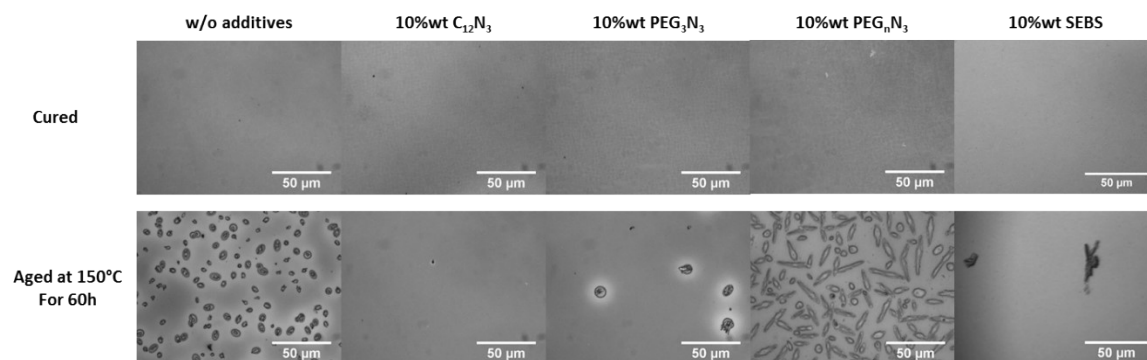

**Figure S 5: Microscopic images of PC<sub>61</sub>BM aggregation in P3HT:PC<sub>61</sub>BM layer in the presence of additives at 10 wt% before and after aging for 60 h at 150°C.**

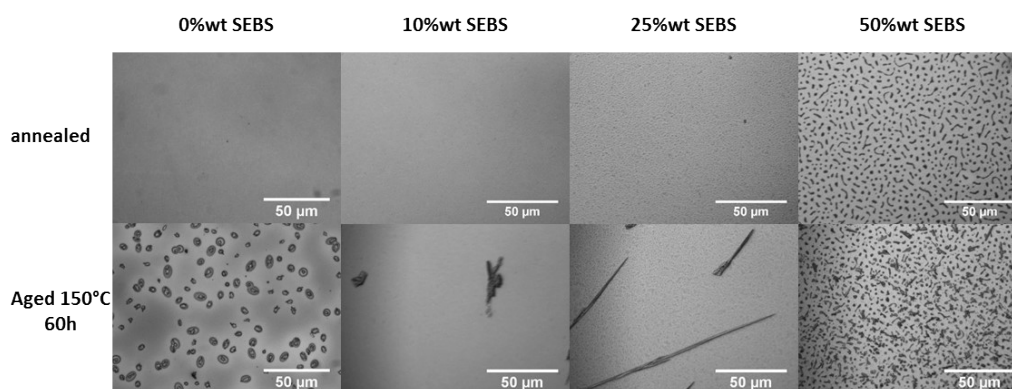

**Figure S 6: Effect of the thermal aging on P3HT:PC<sub>61</sub>BM morphology taken by microscope regarding the SEBS content. The microscopic images show before and after aging of 60 h at 150°C.**

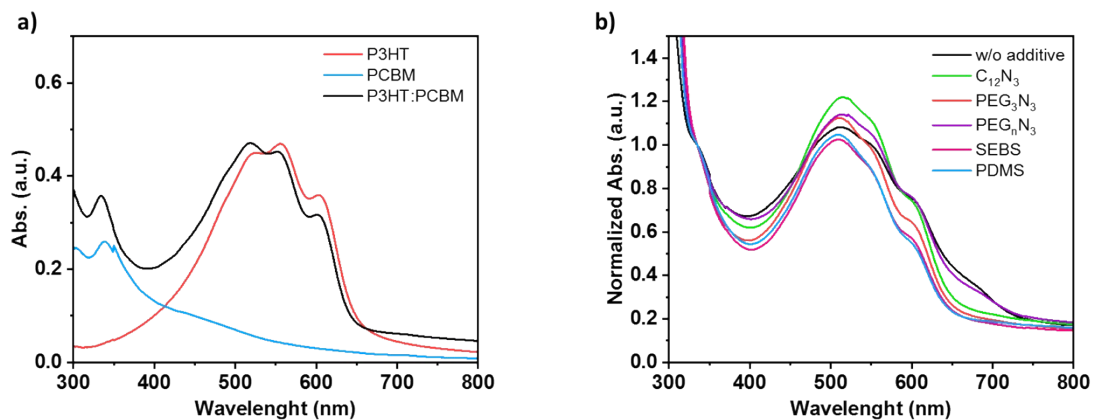

**Figure S 7: UV-vis absorbance spectra obtained of a) casted PC<sub>61</sub>BM, P3HT, and P3HT:PC<sub>61</sub>BM (1:0.8) blend and b) annealed P3HT:PC<sub>61</sub>BM film in the presence of additives at 50 wt%.**

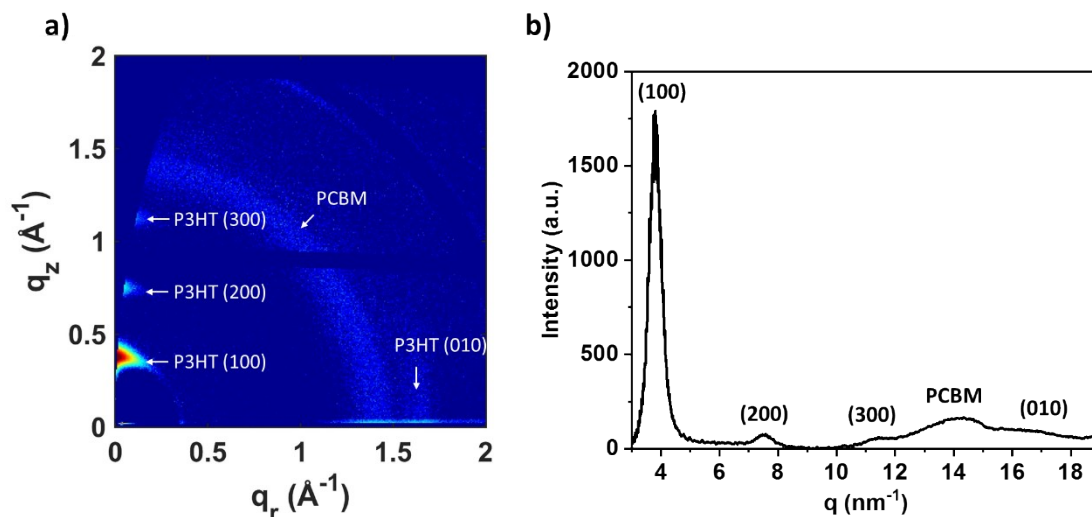

**Figure S 8: a) Two-dimensional GIWAXS image of P3HT:PC<sub>61</sub>BM thin film and b) the resulting integration.**

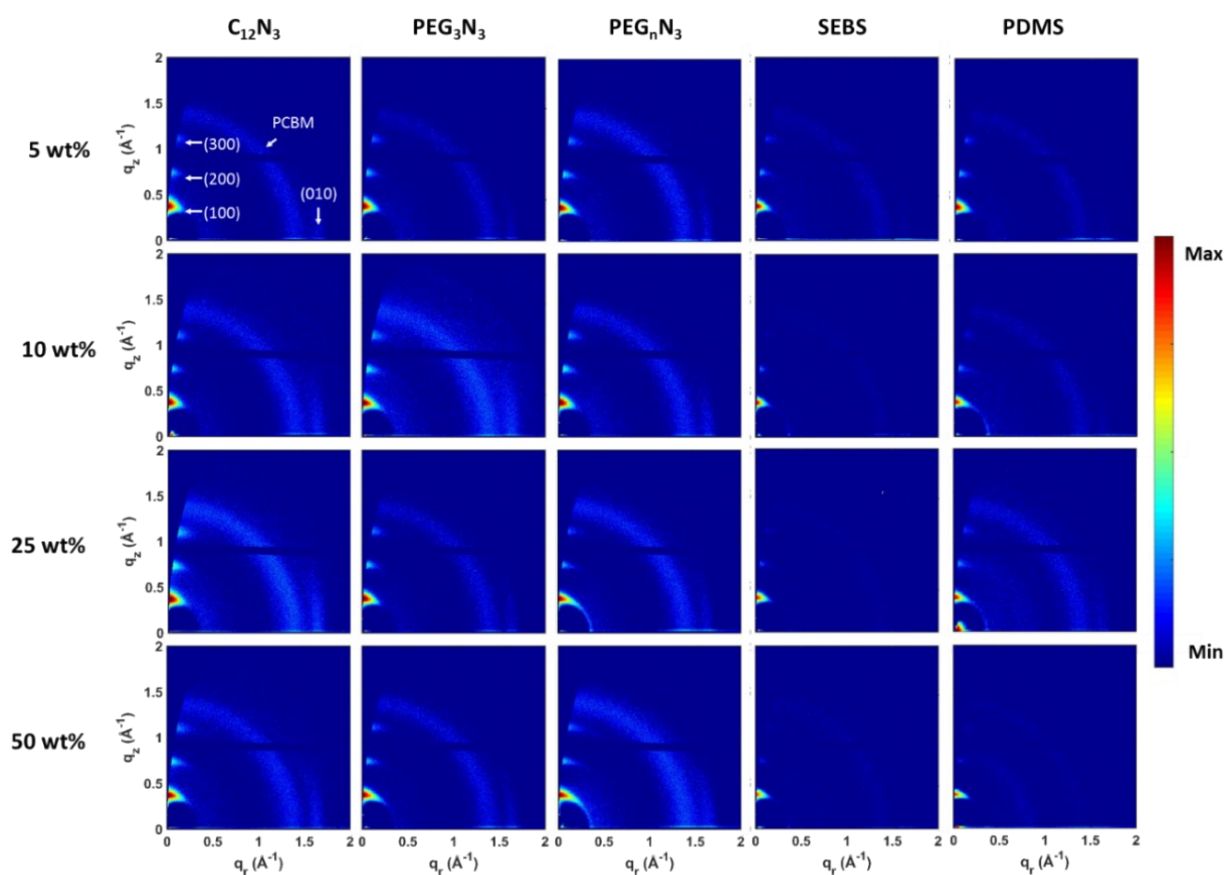

**Figure S 9: 2D grazing incidence X-ray diffraction patterns of annealed P3HT:PC<sub>61</sub>BM blend with additives**

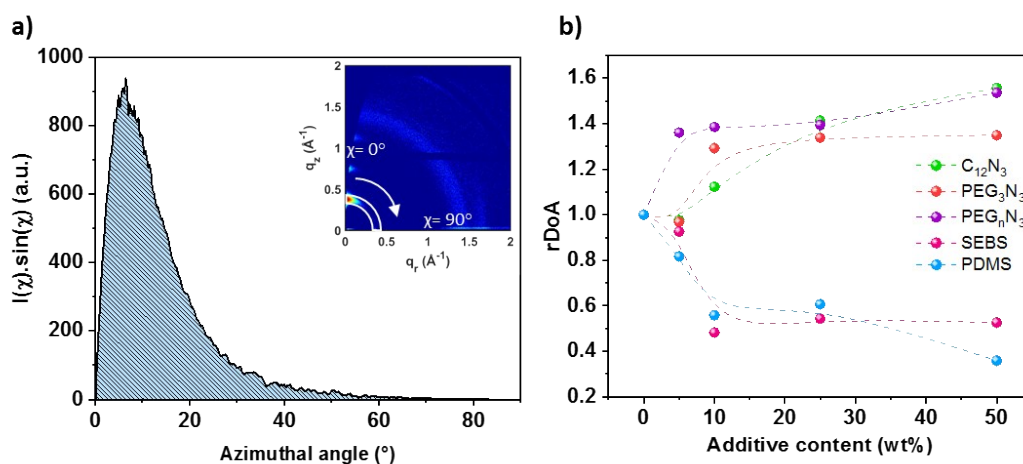

**Figure S 10: a) Example of azimuthal integration of (100) P3HT lamella peak. b) The relative degree of aggregation to neat P3HT:PC<sub>61</sub>BM of (100) peak**

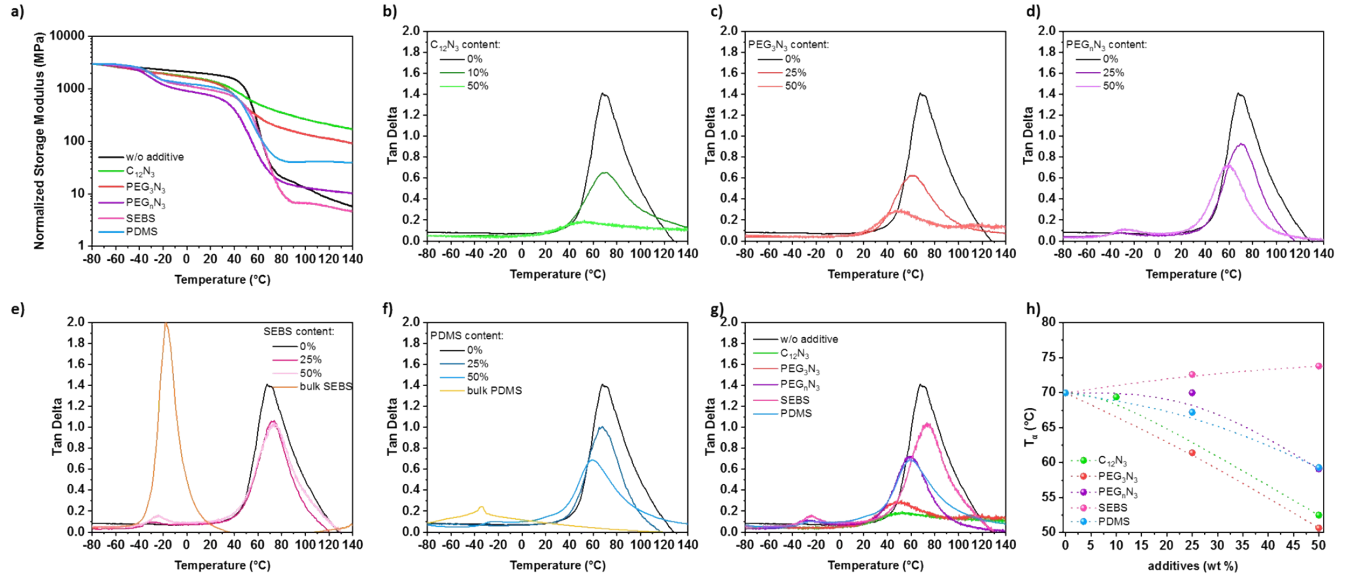

**Figure S 11: Temperature dependence of a) storage modulus and Tan  $\delta$  for the P3HT:PC<sub>61</sub>BM:additive in presence of b) C<sub>12</sub>N<sub>3</sub>, c) PEG<sub>3</sub>N<sub>3</sub>, d) PEG<sub>n</sub>N<sub>n</sub>, e) SEBS, and f) PDMS. g) Comparison of Tan  $\delta$  for P3HT:PC<sub>61</sub>BM:additive composites (1:0.8:0.4), i.e., in the presence of 50 wt% additive and h) Summary of the glass temperature.**

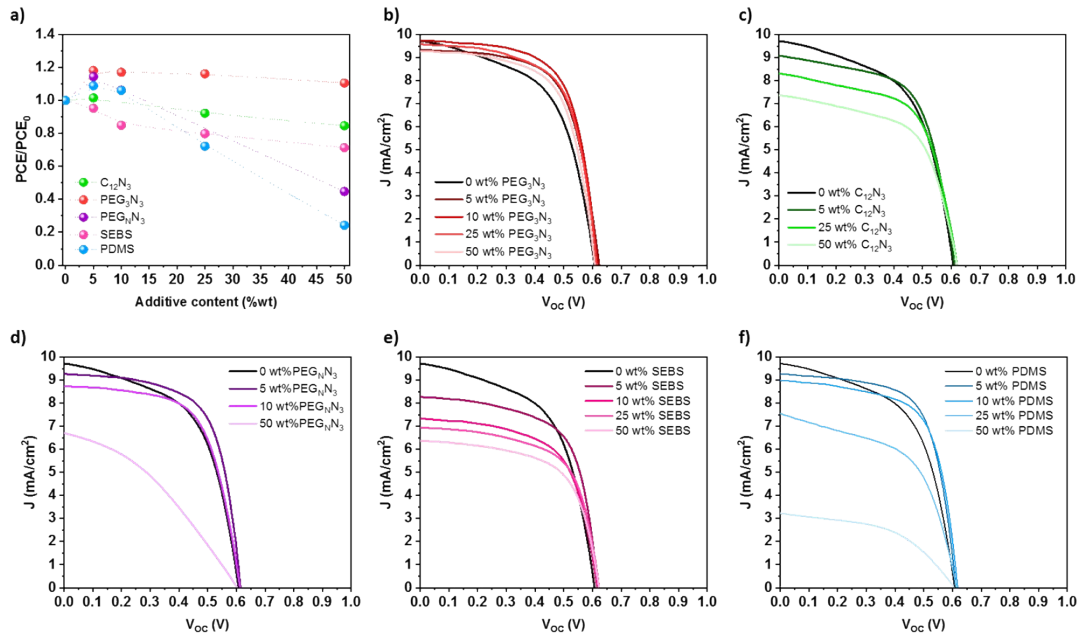

**Figure S 12: Photovoltaic curves associated with P3HT:PC<sub>61</sub>BM solar cells in the presence of additives.**



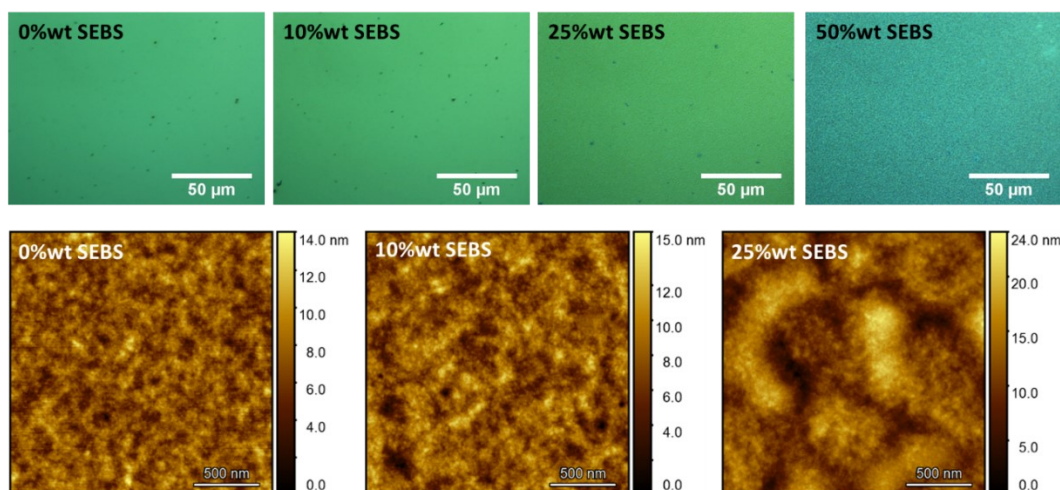

**Figure S 13: PCE10:PC<sub>71</sub>BM:SEBS morphology characterized by optical microscopy (top row) and atomic force microscopy (bottom row).**

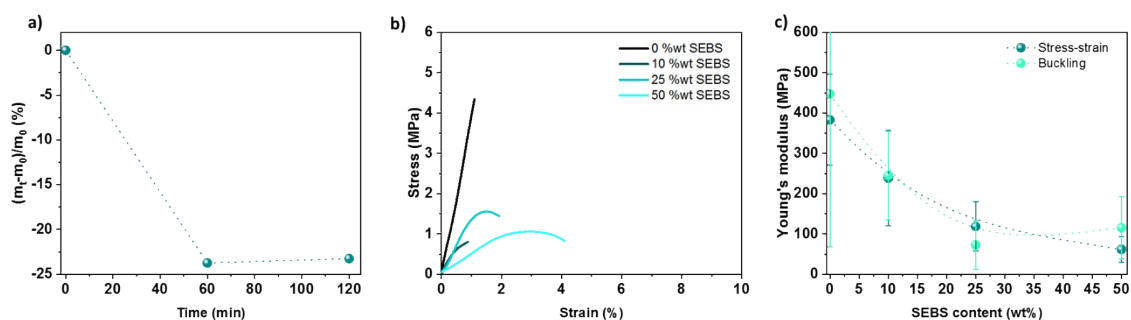

**Figure S 14: a) Mass loss of PCE10:PC<sub>71</sub>BM under vacuum at 50°C after MeOH treatment. b) Characterization stress-strain after vacuum drying at 50°C for 90 min. c) Young's moduli by stress-strain or buckling methods with different amount of SEBS (wt%/wt PC<sub>71</sub>BM).**

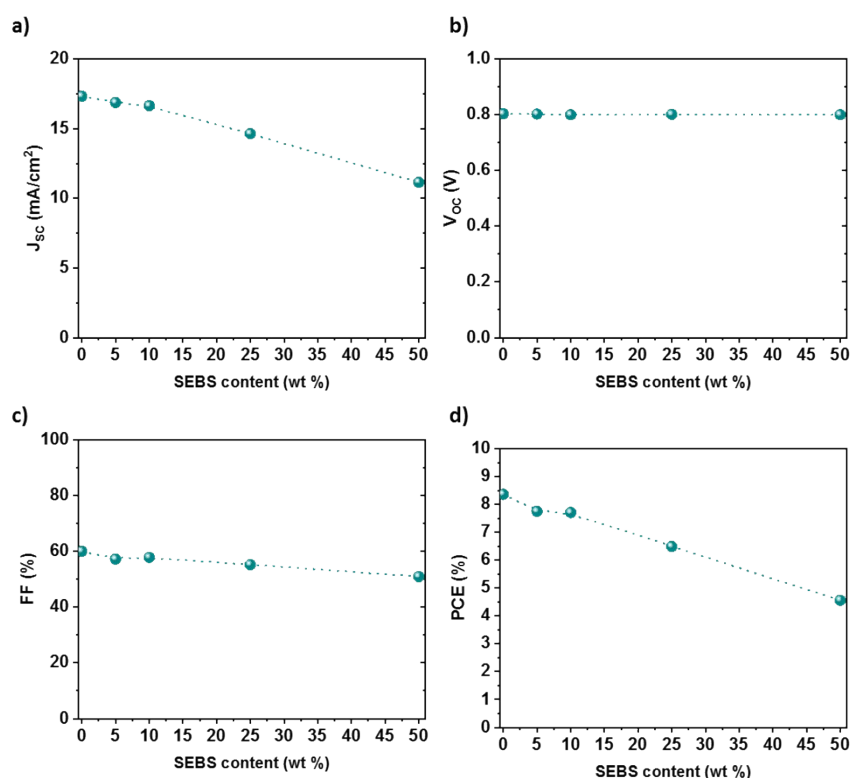

**Figure S 15: Evolution of the photovoltaic characteristics of PCE10:PC<sub>71</sub>BM blend in the function of SEBS additive content.**

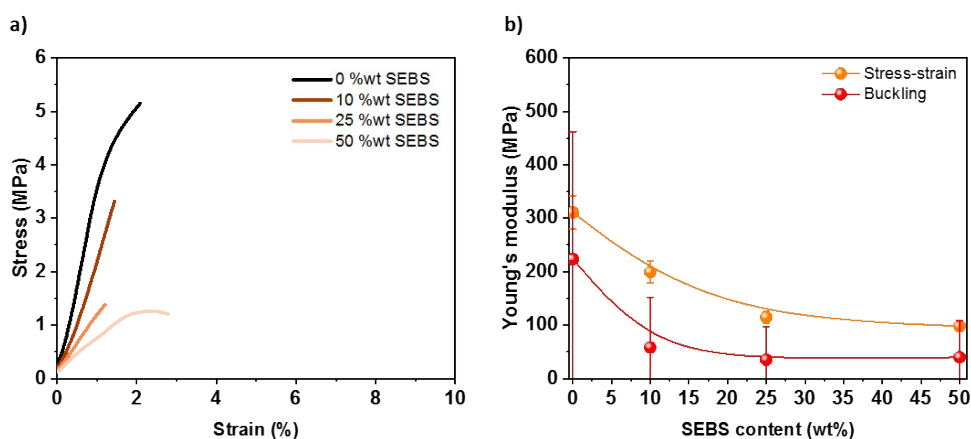

**Figure S 16: Determination of Young's moduli: a) stress-strain curves of PCE13:IT-4F with 0, 10, 25, and 50 wt% SEBS and b) comparison of Young's moduli by buckling method or direct measurements by stress-strain.**



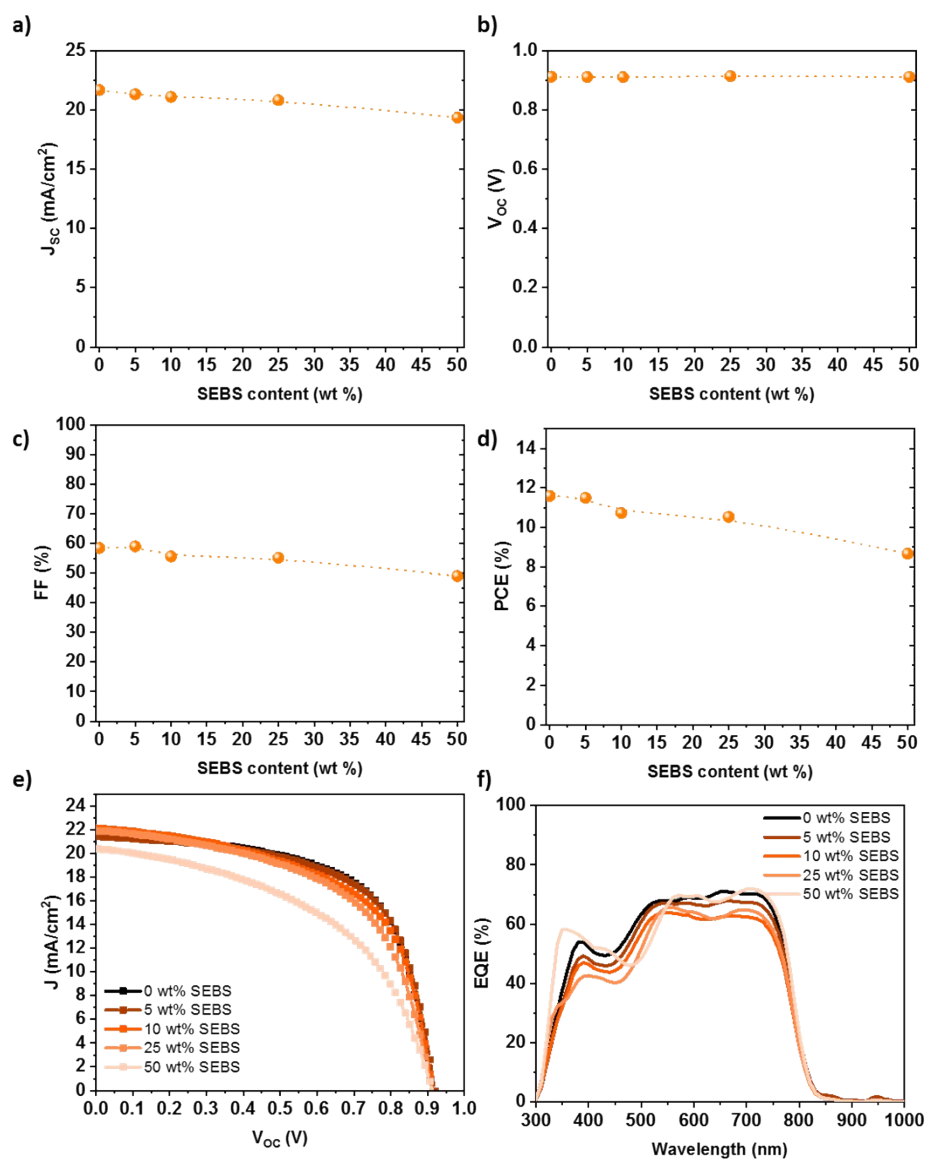

**Figure S 17: Photovoltaic performances of PCE13:IT-4F with different amounts of SEBS elastomer.**

## References

- [1] J. R. Thomas, X. Liu, P. J. Hergenrother, *J. Am. Chem. Soc.* **2005**, *127*, 12434.
